# Supplementary material for: Biomolecular condensates formed by designer minimalistic peptides
Source: PubMed Central journal article supplement (PMC9879991; doi:10.1038/s41467-023-36060-8), 2023-01-26
Supplement: 41467_2023_36060_MOESM1_ESM.pdf [file 41467_2023_36060_MOESM1_ESM.pdf]

## Supplementary Information

### Biomolecular Condensates Formed by Designer Minimalistic Peptides

Avigail Baruch Leshem<sup>1</sup>, Sian Sloan-Dennison<sup>2</sup>, Tlalit Massarano<sup>1</sup>, Shavit Ben-David<sup>1</sup>, Duncan Graham<sup>2</sup>, Karen Faulds<sup>2</sup>, Hugo E. Gottlieb<sup>3</sup>, Jordan H. Chill\*<sup>3</sup> and Ayala Lampel\*<sup>1,4-6</sup>

<sup>1</sup>Shmunis School of Biomedicine and Cancer Research, George S. Wise Faculty of Life Sciences, Tel Aviv University, Tel Aviv 69978, Israel.

<sup>2</sup>Department of Pure and Applied Chemistry, Technology and Innovation Centre, University of Strathclyde, 99 George Street, Glasgow G1 1RD, U.K

<sup>3</sup>Department of Chemistry, Faculty of Exact Sciences, Bar Ilan University, Ramat Gan, 52900, Israel

<sup>4</sup>Center for Nanoscience and Nanotechnology Tel Aviv University, Tel Aviv 69978, Israel.

<sup>5</sup>Sagol Center for Regenerative Biotechnology Tel Aviv University, Tel Aviv 69978, Israel

<sup>6</sup>Center for the Physics and Chemistry of Living Systems Tel Aviv University, Tel Aviv 69978, Israel, Tel Aviv 69978, Israel.

\*co-corresponding authors

email: Jordan.Chill@biu.ac.il; ayalalampel@tauex.tau.ac.il

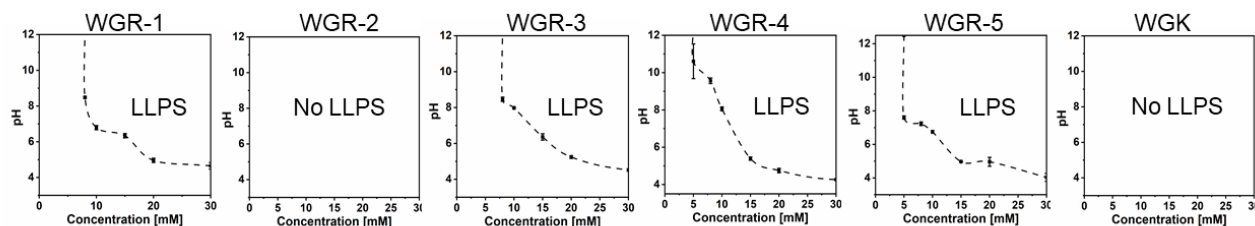

**Supplementary Figure 1.** Phase diagram of the peptides as a function of peptide concentration and pH, in different buffers: citrate buffer for pH 3-7, tris buffer for pH 7-9, and ammonium bicarbonate buffer for pH 9-12. 0.2 M NaCl was added to all samples, measurements were obtained at room temperature. LLPS was not observed for WGR-2 and WGK. Values represent average pH of n=3 independent measurements, data are presented as mean values +/- SD. Source data are provided as a Source Data file.

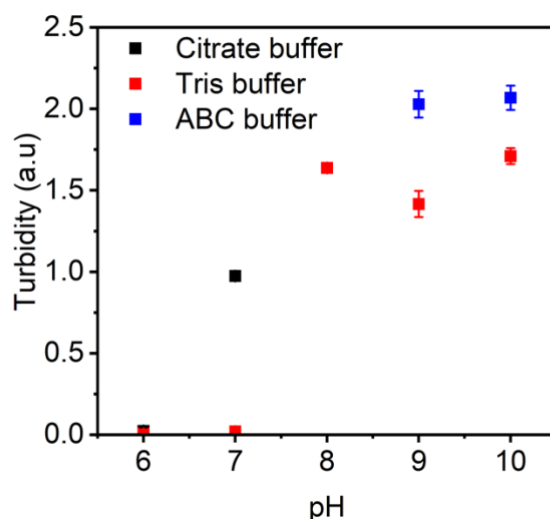

**Supplementary Figure 2.** Turbidity assay of WGR-1 (10 mM) in citrate buffer (pH 6-7), Tris buffer (pH 6-10) and ammonium bicarbonate buffer (ABC, pH 9-10). Turbidity was monitored at  $\lambda=500$  nm. Data are presented as mean values of n=3 +/- SD. Source data are provided as a Source Data file.

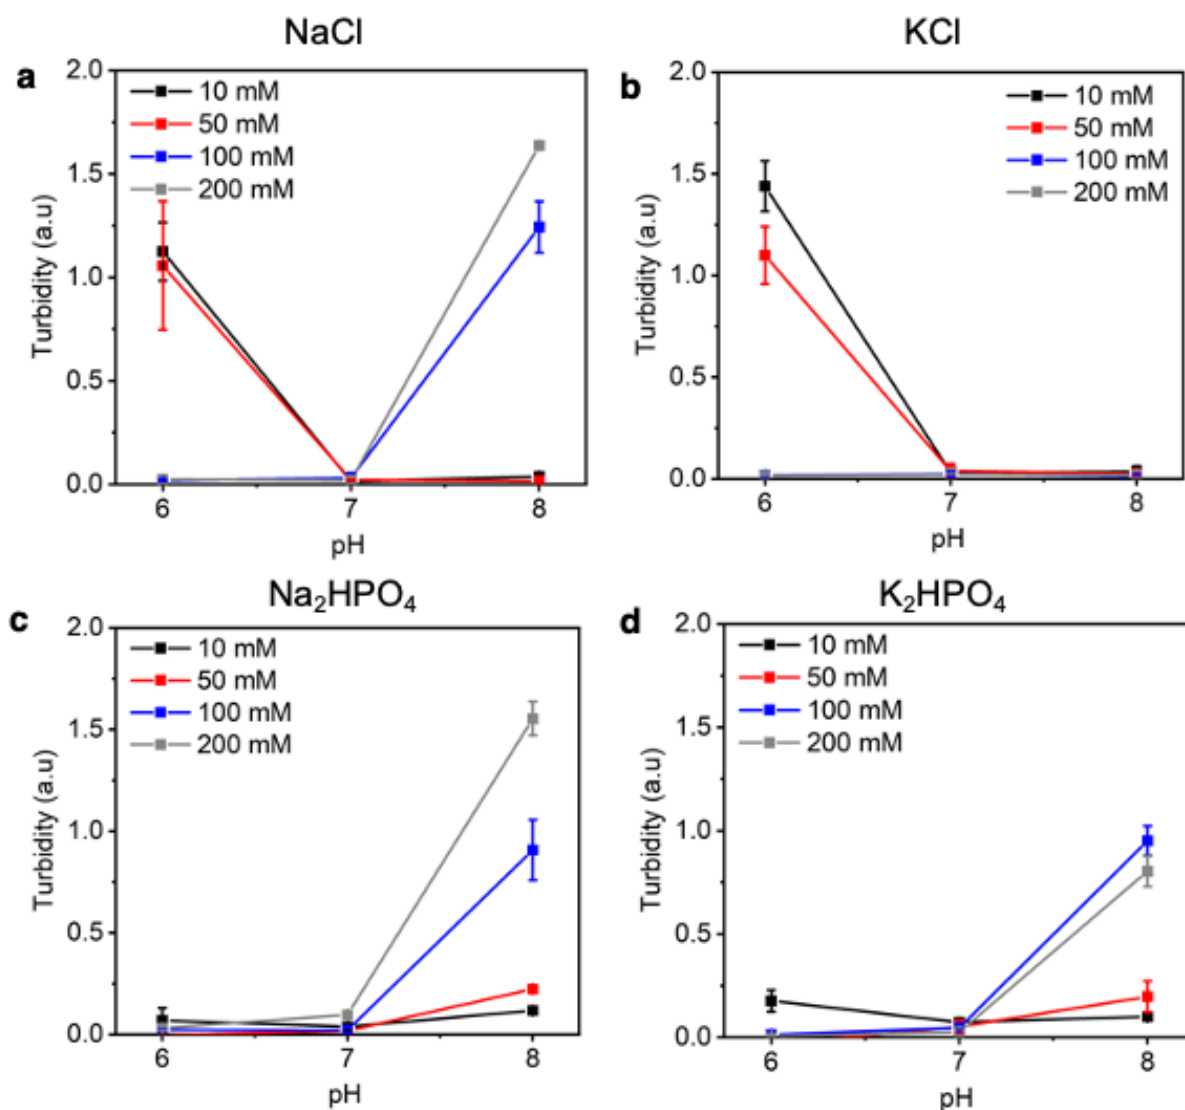

**Supplementary Figure 3. Effect of Hofmeister series salts on peptide LLPS.** Turbidity assay ( $\lambda=500$  nm) of WGR-1 (10 mM) as a function of pH with varying concentrations of either NaCl, KCl, Na<sub>2</sub>HPO<sub>4</sub> or K<sub>2</sub>HPO<sub>4</sub>. Data are presented as mean values of  $n=3 \pm$  SD. Source data are provided as a Source Data file.

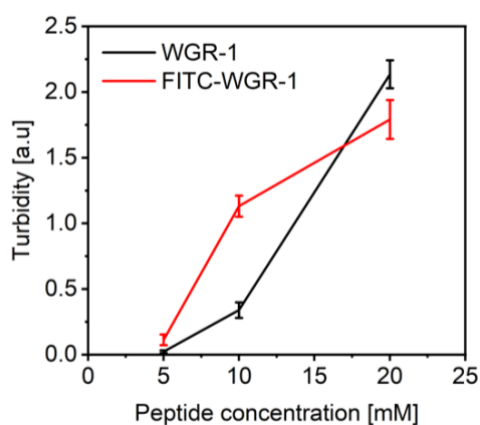

**Supplementary Figure 4.** Turbidity analysis of varying concentrations of WGR-1 in Tris buffer at pH 8 in the presence of 0.2 M NaCl. Red line indicates 0.5% of FITC-labeled peptide. Data are presented as mean values of  $n=3 \pm$  SD. Source data are provided as a Source Data file.

**Supplementary Table 1.**

| <b>Table 1. Apparent diffusion coefficients in the condensed and dilute phase</b> |              |              |              |              |
|-----------------------------------------------------------------------------------|--------------|--------------|--------------|--------------|
|                                                                                   | <b>WGR-1</b> | <b>WGR-3</b> | <b>WGR-4</b> | <b>WGR-5</b> |
| <i>D</i> condensed phase (FRAP)                                                   | 4.58E-14     | 5.53E-14     | 2.53E-14     | 1.41E-14     |
| Error                                                                             | 6.05E-15     | 2.88E-15     | 7.02E-15     | 4.71E-15     |
| <i>D</i> dilute phase (NMR)                                                       | 1.91E-10     | 2.18E-10     | 2.23E-10     | 2.44E-10     |
| Error                                                                             | 0.11E-11     | 0.12E-11     | 0.12E-11     | 0.13E-11     |

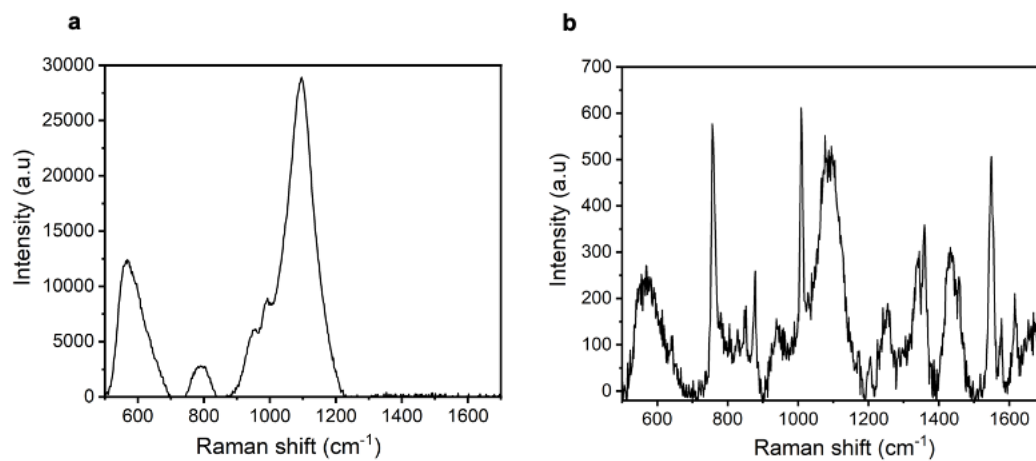

**Supplementary Figure 5. a.** Raman spectra of peptide droplet buffer control (background). **b.** Raman spectra of dried peptide droplets. Source data are provided as a Source Data file.

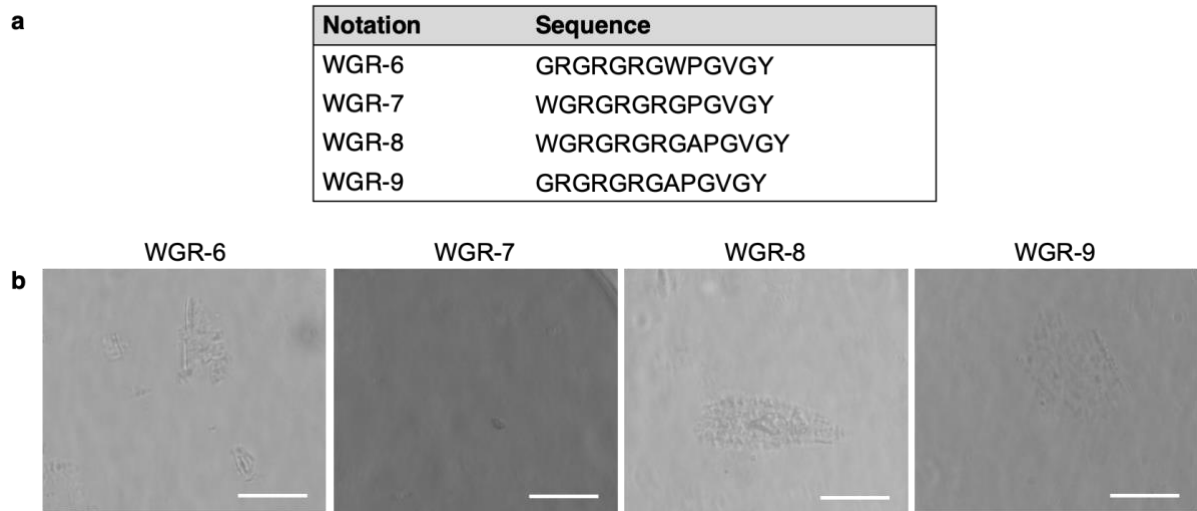

**Supplementary Figure 6. a.** Table of the 4 sequence variants designed to study the role of Trp in LLPS. **b.** Optical microscopy images of the peptides at 30 mM pH 11 with 0.2 M NaCl. No droplets were observed for all 4 peptides. Scale bars=50  $\mu$ m.

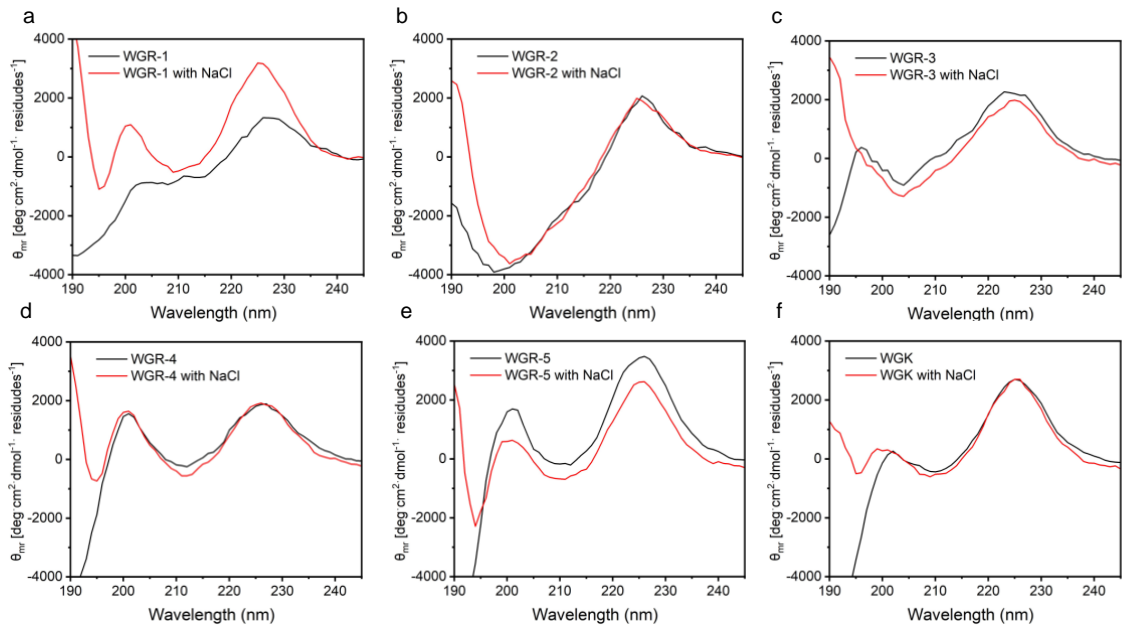

**Supplementary Figure 7.** CD analysis of peptides at 1 mM with and without NaCl.

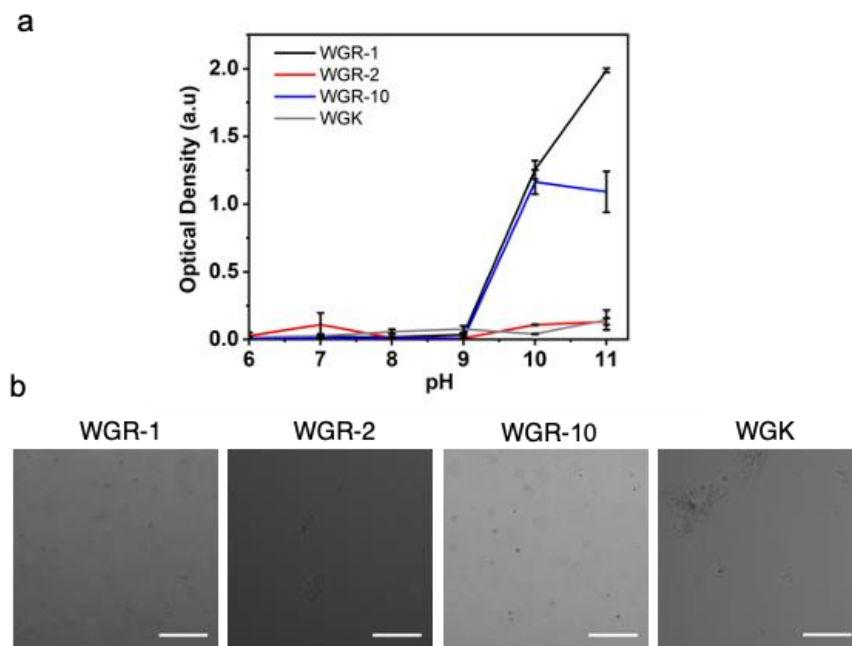

**Supplementary Figure 8. a.** Turbidity analysis of peptide LLPS at a concentration of 20 mM at varying pH values. WGR-10 contains a Pro/Gln substitution. Each point represents an average of  $n=3$ , data are presented as mean values  $\pm$  SD **b.** Optical microscopy images of peptides at 20 mM at pH 10. Scale bar=50  $\mu$ m. Source data are provided as a Source Data file.

## Supplementary Information - NMR analyses

**Supplementary Table 2. pKa values of LLPS-promoting peptides.**

| Supplementary Table 2. pKa values of LLPS-promoting peptides. |             |
|---------------------------------------------------------------|-------------|
| Peptide                                                       | pKa         |
| WGR-1                                                         | 7.50 ± 0.01 |
| WGR-3                                                         | 7.49 ± 0.01 |
| WGR-4                                                         | 7.37 ± 0.01 |
| WGR-5                                                         | 7.51 ± 0.01 |

pKa values were determined by following the chemical shifts of Trp<sup>1</sup>-H $\alpha$  and Trp<sup>1</sup>-H $\beta$  at pH values of 6.0, 7.0, 7.5, 8.0 and 9.0. The 10 obtained chemical shifts were fitted to the Henderson-Hasselbach equation with the assumption that peak position is a weighted average of the two end-point chemical shifts; optimization parameters were the two end-point shifts (representing fully ionized and fully deionized forms of the N-terminal amino group of the peptide. Errors were determined by Monte Carlo simulations with a measurement error of 0.01 ppm for all chemical shifts. Data are presented as mean values +/- SD

**Supplementary Table 3. Urea analysis.**

| Supplementary Table 3. Urea analysis. |                              |                              |                               |                                         |                                         |                      |
|---------------------------------------|------------------------------|------------------------------|-------------------------------|-----------------------------------------|-----------------------------------------|----------------------|
| Peptide                               | Trp <sup>1</sup> -C $\alpha$ | Trp <sup>9</sup> -C $\alpha$ | Pro <sup>10</sup> -C $\alpha$ | Val <sup>12</sup> -C $\alpha$<br>(maj.) | Val <sup>12</sup> -C $\alpha$<br>(min.) | Tyr/Phe14-C $\alpha$ |
| WGR-1                                 | 0.12                         | 0.15                         | 0.05                          | 0.02                                    | 0.08                                    | 0.37                 |
| WGR-2                                 | 0.13                         | <u>0.20</u>                  | ND <sup>a</sup>               | <u>0.09</u>                             | <u>0.15</u>                             | NA <sup>b</sup>      |
| WGR-3                                 | 0.12                         | <b>0.56</b>                  | 0.06                          | 0.03                                    | 0.06                                    | 0.33                 |
| WGR-5                                 | 0.13                         | 0.07                         | 0.04                          | 0.02                                    | 0.07                                    | 0.36                 |

Values represent chemical shift changes (<sup>13</sup>C, ppm, on a 700 MHz spectrometer) for representative C $\alpha$  nuclei along the peptide sequence upon addition of 8 M urea to the sample. All measurements were conducted at 3 mM peptide concentration and maintaining a constant sample volume and temperature (300 K). Values reflecting the intramolecular effect are underlined; the large effect of Phe14 upon Trp9 is in bold.

<sup>a</sup>peak overlaps with the tris buffer peak

<sup>b</sup>Residue 14 is absent in WGR-2



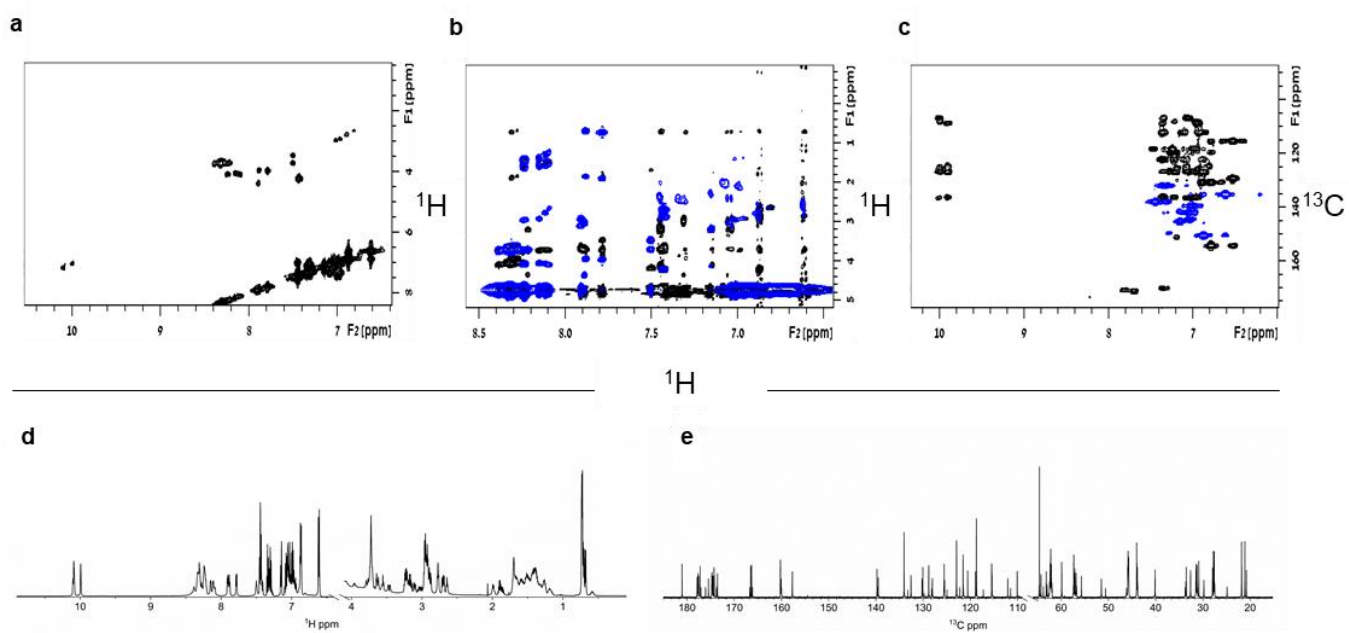

**Supplementary Figure 9. 20 mM WGR-1 NMR data at pH 6, 285 K.** Shown are spectra used for assignment of all residues of the peptide. **a.** 2D-COSY spectra in the  $H^{\text{aro}}\text{-}H^{\text{ali}}$  and  $H^{\text{N}}\text{-}H^{\text{ali}}$  region. **b.** Overlay of homonuclear 2D-TOCOSY (black) and ROESY (blue) spectra in the  $H^{\text{aro}}\text{-}H^{\text{ali}}$  and  $H^{\text{N}}\text{-}H^{\text{ali}}$  region. **c.** Overlay of heteronuclear 2D-HMBC (black) and HMQC (blue) spectra in the aromatic region. **d.** The one-dimensional  $^1\text{H}$  spectrum. **e.** The one-dimensional  $^{13}\text{C}$  spectrum.

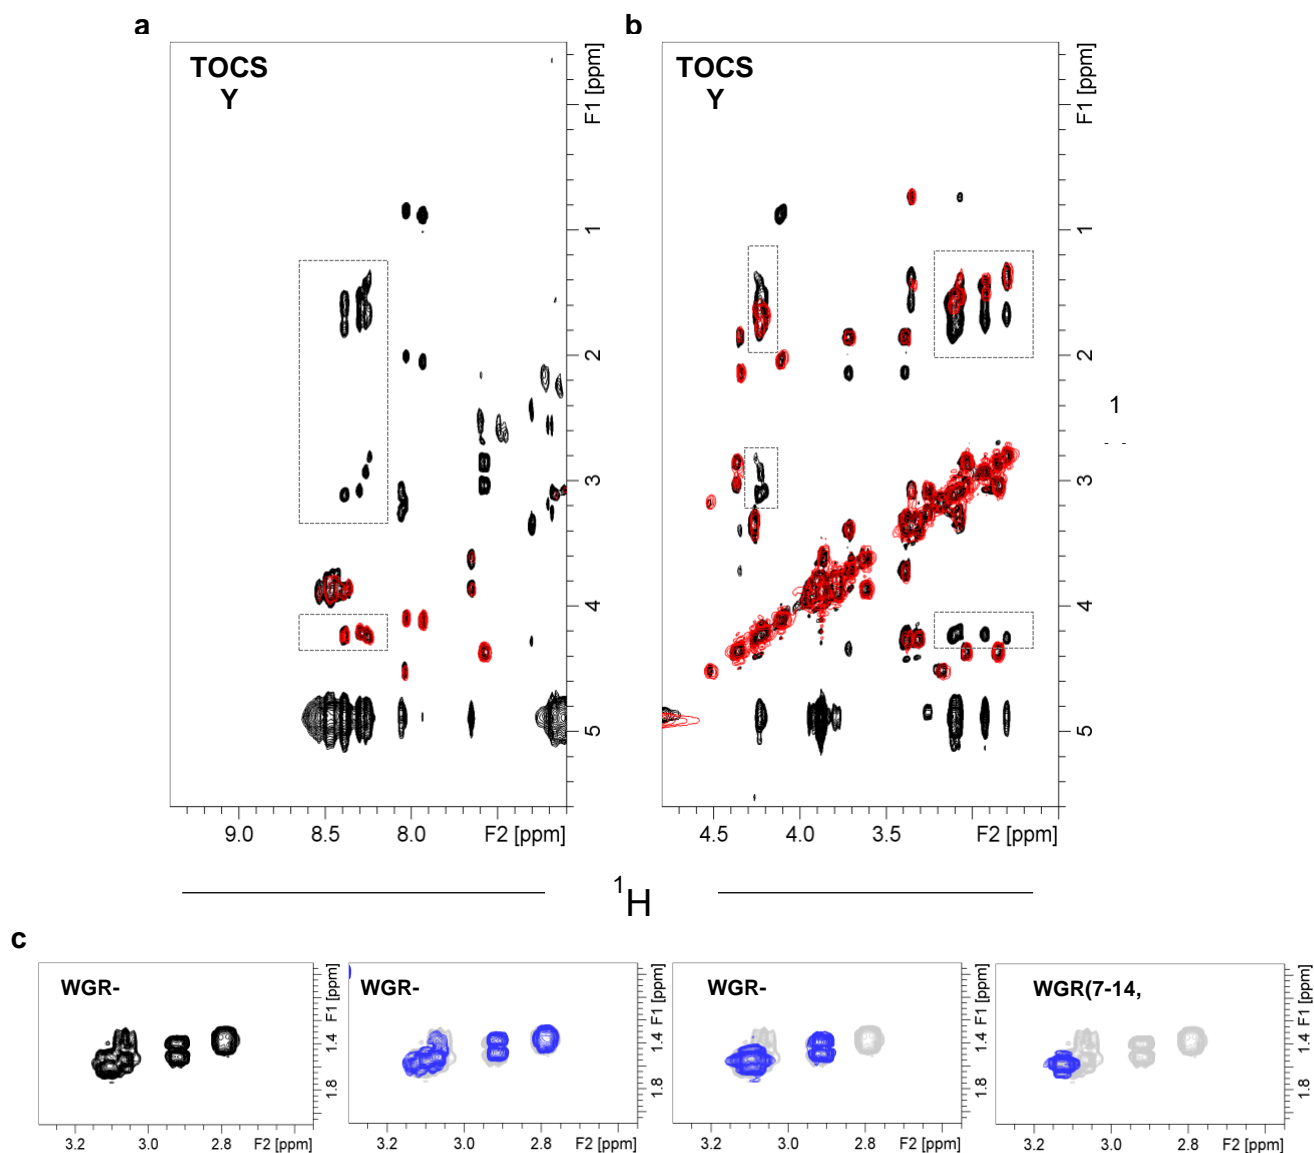

**Supplementary Figure 10.** Assignment of Arg residues in WGR-1. Shown are spectra used for assignment of the Arg residues of the peptide. **a.** Overlay of homonuclear 2D-TOCSY (black) and COSY (red) spectra in the  $H^N$ - $H^{ali}$  region with Arg regions and assignments highlighted. **b.** Overlay of the  $H^{ali}$ - $H^{ali}$  region of the same spectra. **c.** Focus on the Arg( $H^\gamma$ ,  $H^\delta$ ) region of the COSY spectrum. Left panel shows this region for WGR-1 (0 M NaCl, pH 6) and successive panels show comparisons of other peptides (blue) to the original peptide (grey). The WGR-2 spectrum demonstrates that upfield shifts are not the result of an interaction with the Y<sup>14</sup> ring, and the WGR-P10Q spectrum (abolishing the cis/trans conformations) shows that the upfield shift represents a minor conformation (cis). The WGR(7-14, P10Q) spectrum (lacking the R<sup>3</sup>/R<sup>5</sup> signals) demonstrates the assignment of R<sup>7</sup>.

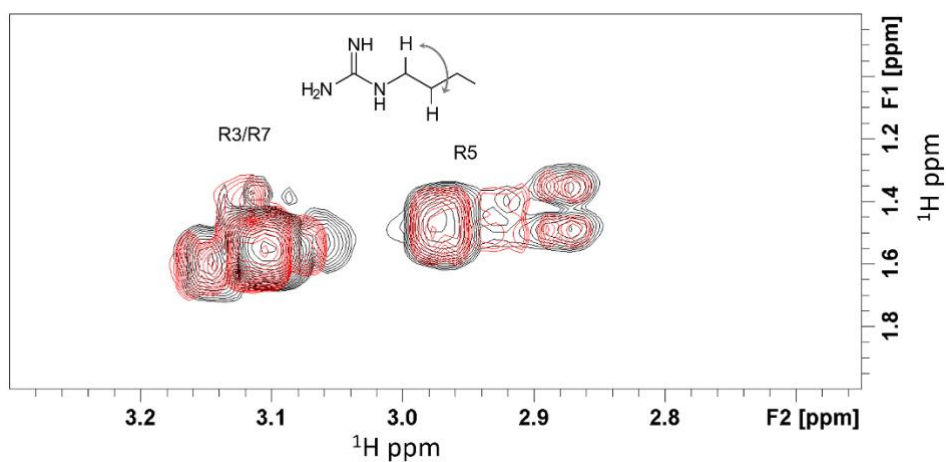

**Supplementary Figure 11.** NMR determines the molecular mechanism of droplet formation in WGR-3. Region of the 2D- $^1\text{H}$ ,  $^1\text{H}$ -COSY spectrum showing the correlation between arginine  $\text{H}^\gamma$ - $\text{H}^\delta$  protons for the WGR-3 peptide at 20 (black, LLPS) and 5 (red, non-LLPS) mM in 50 mM tris buffer pH 10 and 300 K. Changes are observed in the cross-peaks corresponding to Arg<sup>7</sup>

Supplementary Table 4.

| <b><sup>1</sup>H chemical shifts for WGR-1, 20 mM at pH 6, 285 K<sup>a</sup></b> |                                            |                                            |                                            |                                        |                                        |                                            |                                             |                                             |                                             |
|----------------------------------------------------------------------------------|--------------------------------------------|--------------------------------------------|--------------------------------------------|----------------------------------------|----------------------------------------|--------------------------------------------|---------------------------------------------|---------------------------------------------|---------------------------------------------|
| <b>Residue</b>                                                                   | <b><sup>1</sup>H<sup>N</sup><br/>[ppm]</b> | <b><sup>1</sup>H<sup>α</sup><br/>[ppm]</b> | <b><sup>1</sup>H<sup>β</sup><br/>[ppm]</b> | <b><sup>1</sup>H<sup>γ</sup> [ppm]</b> | <b><sup>1</sup>H<sup>δ</sup> [ppm]</b> | <b><sup>1</sup>H<sup>ε</sup><br/>[ppm]</b> | <b><sup>1</sup>H<sup>ζ2</sup><br/>[ppm]</b> | <b><sup>1</sup>H<sup>ζ3</sup><br/>[ppm]</b> | <b><sup>1</sup>H<sup>η2</sup><br/>[ppm]</b> |
| W <sub>1</sub>                                                                   | 10.25<br>(10.26) <sup>b,c</sup>            | 4.27                                       | 3.35,<br>3.41                              | -                                      | 7.30 (7.31)                            | 7.59                                       | 7.50                                        | 7.16                                        | 7.23                                        |
| R <sub>3</sub> /R <sub>5</sub>                                                   | 8.27/8.31                                  | 4.23                                       | 1.72                                       | 1.44                                   | 2.93/3.08                              | -                                          | -                                           | -                                           | -                                           |
| R <sub>7</sub>                                                                   | 8.25                                       | 4.26                                       | 1.67                                       | 1.38                                   | 2.80                                   | -                                          | -                                           | -                                           | -                                           |
| W <sub>9</sub>                                                                   | 10.15<br>(10.24) <sup>b</sup>              | 4.85<br>(4.53)                             | 3.09,<br>3.26<br>(3.18)                    | -                                      | 7.18 (7.20)                            | 7.61<br>(7.46)                             | 7.46                                        | 7.12                                        | 7.21                                        |
| P <sub>10</sub>                                                                  | -                                          | 4.35                                       | 2.15                                       | (1.34)                                 | 3.72, 3.39<br>(3.35, 3.07)             | -                                          | -                                           | -                                           | -                                           |
| V <sub>12</sub>                                                                  | 7.94<br>(8.04)                             | 4.13<br>(4.11)                             | 2.05<br>(2.01)                             | 0.89, 0.88<br>(0.86, 0.83)             | -                                      | -                                          | -                                           | -                                           | -                                           |
| Y <sub>14</sub>                                                                  | 7.58                                       | 4.38                                       | 2.86,<br>3.04                              | 7.02 (7.03)                            | 6.77                                   | -                                          | -                                           | -                                           | -                                           |

<sup>a</sup> Glycine residues were not determined due to spectral overlap

<sup>b</sup> Chemical shift for ε1 position

<sup>c</sup> Numbers in brackets represent the chemical shift for the minor isomer

Supplementary Table 5.

| <b><sup>13</sup>C chemical shifts for WGR-1, 20 mM at pH 6, 285 K<sup>a</sup></b> |                                   |                                   |                                   |                                    |                                    |                                    |                                    |                                    |                                    |                                    |
|-----------------------------------------------------------------------------------|-----------------------------------|-----------------------------------|-----------------------------------|------------------------------------|------------------------------------|------------------------------------|------------------------------------|------------------------------------|------------------------------------|------------------------------------|
| <b>Residue</b>                                                                    | <b><sup>13</sup>C<sup>α</sup></b> | <b><sup>13</sup>C<sup>β</sup></b> | <b><sup>13</sup>C<sup>γ</sup></b> | <b><sup>13</sup>C<sup>δ1</sup></b> | <b><sup>13</sup>C<sup>δ2</sup></b> | <b><sup>13</sup>C<sup>ε2</sup></b> | <b><sup>13</sup>C<sup>ε3</sup></b> | <b><sup>13</sup>C<sup>ζ2</sup></b> | <b><sup>13</sup>C<sup>ζ3</sup></b> | <b><sup>13</sup>C<sup>η2</sup></b> |
|                                                                                   | [ppm]                             | [ppm]                             | [ppm]                             | [ppm]                              | [ppm]                              | [ppm]                              | [ppm]                              | [ppm]                              | [ppm]                              | [ppm]                              |
| W <sub>1</sub>                                                                    | 56.85                             | 30.88                             | 110.08                            | 128.81                             | 130.07                             | 139.77                             | 121.53                             | 115.49                             | 122.93                             | 125.55                             |
| W <sub>9</sub>                                                                    | 55.73<br>(56.74) <sup>b</sup>     | 29.81<br>(31.17)                  | 112.08<br>(111.48)                | 128.05<br>(128.21)                 | 130.23<br>(130.10)                 | 139.51<br>(139.64)                 | 121.55<br>(121.47)                 | 115.43                             | 122.93                             | 125.46<br>(125.60)                 |
| P <sub>10</sub>                                                                   | 64.29<br>(63.78)                  | 32.62<br>(33.74)                  | 21.12,<br>(24.89)                 | 51.50<br>(50.62)                   | -                                  | -                                  | -                                  | -                                  | -                                  | -                                  |
| V <sub>12</sub>                                                                   | 63.18<br>(62.96)                  | 33.54<br>(33.61)                  | 21.82<br>(20.78,<br>21.79)        | -                                  | -                                  | -                                  | -                                  | -                                  | -                                  | -                                  |
| Y <sub>14</sub>                                                                   | 59.91                             | 40.13                             | 132.58                            | 134.03                             | -                                  | 118.73                             | -                                  | 157.69<br>(157.72)                 | -                                  | -                                  |

<sup>a</sup> Glycines and arginines residues were not determined due to spectral overlap

<sup>b</sup> Numbers in brackets represent the chemical shift for the minor isomer.
