# Supplementary material for: Biomolecular condensates formed by designer minimalistic peptides
Source: PubMed Central journal article supplement (PMC9879991; doi:10.1038/s41467-023-36060-8), 2023-01-26
Supplement: 41467_2023_36060_MOESM3_ESM.pdf [file 41467_2023_36060_MOESM3_ESM.pdf]

## Description of Supporting Information

**Supplementary Data 1:**  $^{13}\text{C}$  chemical shifts comparison for WGR-1, 5 & 20 mM, with and without 100 mM NaCl, pH 8, 300 K.
